# Supplementary material for: Predicting severe or critical symptoms in hospitalized patients with COVID-19 from Yichang, China
Source: publisher site journal article supplement (doi:10.18632/aging.202261), 2020-12-09
Supplement: Supplementary file [file aging-v13i2-202261-supplementary-material-SD2.pdf]

## Supplementary Table

**Supplementary Table 1. The baseline characteristics of study patients with COVID-19.**

| Characteristics             | Mild or ordinary cases<br>(n=326) | Severe or critical cases<br>(n=44) | <i>p</i> |
|-----------------------------|-----------------------------------|------------------------------------|----------|
| Age (years)                 | 51 (38, 65)                       | 70 (60, 79)                        | <0.001   |
| Males                       | 176 (54%)                         | 24 (54.5%)                         | 0.944    |
| Contact with WH             | 127 (41.8%)                       | 40 (90.9%)                         | <0.001   |
| Death                       | 0 (0%)                            | 16 (36.4%)                         | <0.001   |
| Hypertension                | 63 (19.4%)                        | 22 (50%)                           | <0.001   |
| Diabetes                    | 31 (9.5%)                         | 11 (25%)                           | 0.002    |
| Smoking                     | 50 (15.4%)                        | 6 (13.6%)                          | 0.762    |
| Cerebrovascular disease     | 6 (1.8%)                          | 5 (11.4%)                          | <0.001   |
| Cardiovascular disease      | 10 (3.1%)                         | 9 (20.5%)                          | <0.001   |
| Diagnostic delay (days)     | 3 (2, 5)                          | 6 (3, 10)                          | <0.001   |
| WBC                         | 4.400 (3.400, 5.595)              | 5.600 (4.450, 7.800)               | <0.001   |
| NEUT                        | 61.70 (53.80, 69.50)              | 81.10 (67.80, 89.70)               | <0.001   |
| LYMPH                       | 27.95 (21.60, 35.10)              | 12.85 (6.500, 22.65)               | <0.001   |
| MONO                        | 7.100 (5.200, 9.200)              | 4.250 (2.600, 7.200)               | <0.001   |
| NEUT (×10 <sup>9</sup> /L)  | 2.640 (1.900, 3.660)              | 4.635 (2.940, 6.690)               | <0.001   |
| LYMPH (×10 <sup>9</sup> /L) | 1.205 (0.870, 1.550)              | 0.755 (0.515, 1.015)               | <0.001   |
| MONO (×10 <sup>9</sup> /L)  | 0.300 (0.230, 0.400)              | 0.280 (0.200, 0.365)               | 0.159    |
| PLT (×10 <sup>9</sup> /L)   | 139 (110, 190)                    | 136 (92, 181.5)                    | 0.121    |
| PCT (ng/mL)                 | 0.0800 (0.0500, 0.120)            | 0.135 (0.0800, 0.265)              | <0.001   |
| TBIL (μmol/L)               | 9.010 (6.660, 13.03)              | 9.030 (6.935, 14.55)               | 0.611    |
| DBIL (μmol/L)               | 2.310 (1.550, 3.420)              | 3.100 (2.250, 4.970)               | <0.001   |
| ALB (g/L)                   | 38.15 (34.75, 41.15)              | 29.60 (27.40, 36.10)               | <0.001   |
| ALT (UL)                    | 21 (14, 33)                       | 23.50 (14.50, 34.50)               | 0.695    |
| AST (UL)                    | 21 (16, 28)                       | 24 (21, 36.50)                     | 0.006    |
| Cr (μmol/L)                 | 68.20 (54.60, 79.60)              | 65.60 (54.55, 83.95)               | 0.777    |
| CK (UL)                     | 59 (40, 99)                       | 84 (46, 132)                       | 0.144    |
| CKMB (UL)                   | 11.80 (9.400, 16)                 | 15.05 (9.900, 27.10)               | 0.021    |
| CRP (mg/L)                  | 17.20 (4, 43.30)                  | 42.95 (13.35, 69)                  | <0.001   |
| LDH (UL)                    | 202.5 (163.5, 258.5)              | 315.5 (217, 454)                   | <0.001   |
| HGB (g/L)                   | 122 (111, 134)                    | 114 (98, 122.5)                    | <0.001   |

Abbreviations: WH, Wuhan; WBC, white blood cell; NEUT, neutrophil; LYMPH, lymphocyte; MONO, monocyte; PLT, platelet; PCT, procalcitonin; TBIL, total bilirubin; DBIL, direct bilirubin; ALB, albumin; ALT, alanine transaminase; AST, aspartate aminotransferase; Cr, creatinine; CK, creatine kinase; CKMB, creatine phosphokinase-isoenzyme-MB; CRP, C-reactive protein; LDH, lactate dehydrogenase; HGB, hemoglobin. The *p* value was calculated using the rank sum test or  $\chi^2$  test where appropriate. Data are expressed as median (interquartile range) or count (percentage).
